# Supplementary material
Source: publisher figshare collection journal article supplement (https://wiley.figshare.com/articles/dataset/_/3558240)
Supplement: Supplementary file 1 [file 1]

# A tutorial to perform fourth-corner and RLQ analyses in

Stéphane Dray

`stephane.dray@univ-lyon1.fr`

July 21, 2013

## Abstract

This tutorial shows how the fourth-corner and RLQ analyses can be performed using the `ade4` package (Dray and Dufour, 2007) for . The dataset presented in the paper is used to illustrate the methods. Commands are written in red and outputs are written in blue.

## Contents

|          |                                         |          |
|----------|-----------------------------------------|----------|
| <b>1</b> | <b>Loading the package and the data</b> | <b>2</b> |
| <b>2</b> | <b>RLQ</b>                              | <b>2</b> |
| <b>3</b> | <b>Fourth-corner</b>                    | <b>4</b> |
| <b>4</b> | <b>Combining both approaches</b>        | <b>6</b> |

# 1 Loading the package and the data

The different methods presented in the paper are available in the `ade4` package. The first step is to load `ade4` and the datasets:

```
library(ade4)
data(aravo)
```

The `aravo` dataset contains the abundances of 82 species in 75 sites. Species are described by 8 traits and 6 environmental variables have been measured in the sites.

```
dim(aravo$spe)
```

```
[1] 75 82
```

```
dim(aravo$traits)
```

```
[1] 82 8
```

```
dim(aravo$env)
```

```
[1] 75 6
```

# 2 RLQ

A preliminary step of RLQ analysis is to perform the separate analyses of each table. Correspondence analysis (`dudi.coa`) is applied to the species table. For traits data, all variables are quantitative and thus we applied a principal component analyses (`dudi.pca`). The environmental table contains both quantitative and categorical variables. In this case, we used the `dudi.hillsmith` function that allows to consider mix of different types of variables. Note that to proceed RLQ analysis, separate analyses of traits and environmental variables should be weighted by the sites and species weights derived from the previous correspondence analysis.

```
afcL.aravo <- dudi.coa(aravo$spe, scannf = FALSE)
acpR.aravo <- dudi.hillsmith(aravo$env, row.w = afcL.aravo$lw,
  scannf = FALSE)
acpQ.aravo <- dudi.pca(aravo$traits, row.w = afcL.aravo$cw,
  scannf = FALSE)
rlq.aravo <- rlq(acpR.aravo, afcL.aravo, acpQ.aravo,
  scannf = FALSE)
```

RLQ analysis finds coefficients (in `$c1`) to obtain a linear combination of traits (species scores in `$lQ`) and coefficients (in `$l1`) to obtain a linear combination of environmental variables (site scores in `$lR`). The covariance between these two sets scores is maximized and equal to the square root of the corresponding eigenvalue.

The different outputs of the analysis are obtained by the `plot` function:

```
plot(rlq.aravo)
```

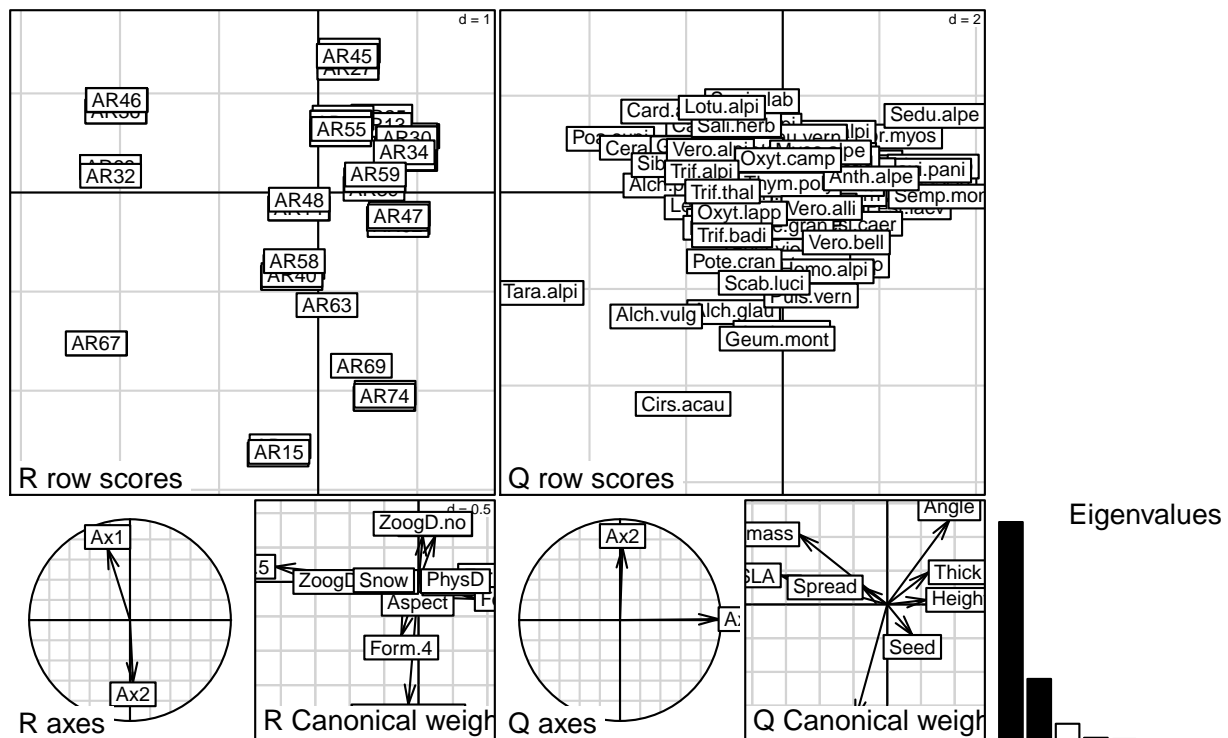

The different figures can be obtained separately by plotting the different elements contained in the `rlq.aravo` object:

```
par(mfrow = c(1, 3))
s.arrow(rlq.aravo$11)
s.arrow(rlq.aravo$c1)
s.label(rlq.aravo$lQ, boxes = FALSE)
```

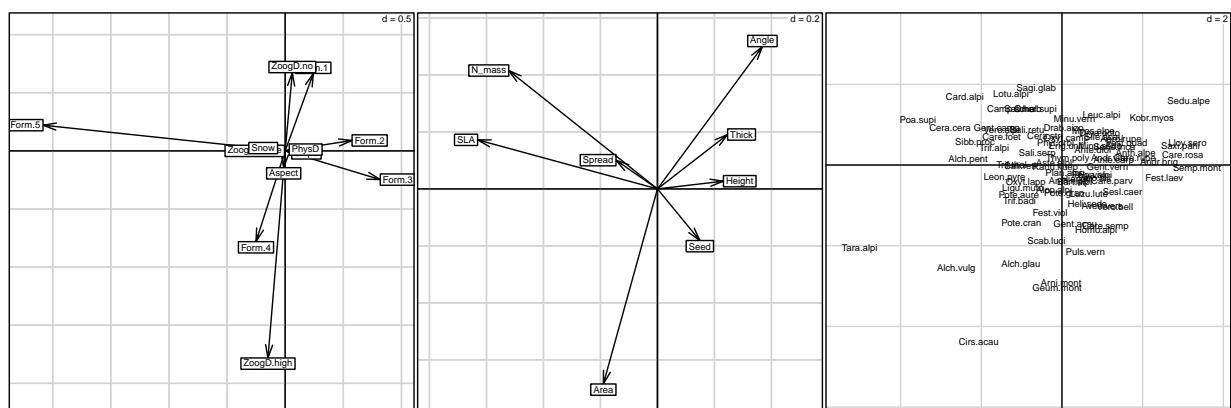

As RLQ analysis maximizes the covariance between the traits and the environmental variables mediated by the species abundances, it is important to see how the individual parts (i.e.  $cov(traits, env)^2 = var(traits) \times var(env) \times cor(traits, env)^2$ ) of the compromise are considered. Hence, one can compare the RLQ analysis to the separate analyses which maximize independently the structure of the trait (principal component analysis of the traits), the structure of the environment (Hill-Smith analysis of the environmental variables) and the correlation (correspondence analysis of the sites-species table). These comparisons are provided by the `summary` function.

```
summary(rlq.aravo)

Eigenvalues decomposition:
  eig covar sdR sdQ corr
1 0.4280 0.6542 0.9924 1.527 0.4318
2 0.1198 0.3462 1.0991 1.145 0.2751

Inertia & coinertia R:
  inertia max ratio
1 0.985 1.321 0.7457
12 2.193 2.537 0.8645

Inertia & coinertia Q:
  inertia max ratio
1 2.331 2.409 0.9675
12 3.641 3.907 0.9319

Correlation L:
  corr max ratio
1 0.4318 0.8128 0.5312
2 0.2751 0.6484 0.4243
```

The correlation is quite low for the second axis (0.2753). The variance of the environmental scores is well preserved on the first two axes (89.53 %). For the traits, the amount of variance preserved (2.341 and 3.667) is nearly equal to the amount obtained in simple principal component analysis (2.409 and 3.907).

### 3 Fourth-corner

Fourth-corner analysis can be used to test the associations between individual traits and environmental variables. To obtain a test with a correct type I error, results of model 2 (permutation of sites, i.e. rows) and 4 (permutation of species, i.e. columns) should be combined. While the former version of `ade4` required three steps (tests with the two models and combination of the results), the combined approach can now be run by setting the `modeltype` argument to 6. Note that we used a very high number of repetitions (`nrepet <- 49999`) to have enough power in corrected tests. This is time-consuming and could be modified to speed up the different analyses (e.g., `nrepet <- 999`). Note that by default, the `nrepet` argument of the `fourthcorner` function is set to 999.

```
nrepet <- 49999
four.comb.aravo <- fourthcorner(aravo$env, aravo$spe,
  aravo$traits, modeltype = 6, p.adjust.method.G = "none",
  p.adjust.method.D = "none", nrepet = nrepet)
```

Then, results can be plotted. Blue cells correspond to negative significant relationships while red cells correspond to positive significant relationships (this can be modified using the argument `col`). In this example, there are some associations between categorical traits and quantitative environmental variable which can be measured in three different ways (Legendre et al., 1997). These three methods correspond to three possible values of the `stat` argument in the `plot` and `print` functions:

- `stat="D2"`: the association is measured between the quantitative variable and each category separately. A correlation coefficient is used to indicate the strength of the association between the given category and the small or large values of the quantitative variable.
- `stat="G"`: the association between the quantitative variable and the whole categorical variable is measured by a global statistic ( $F$ ).
- `stat="D"`: the association is estimated between the quantitative variable and each category separately by a measure of the within-group homogeneity. The strength of the association is indicated by the dispersion of the values of the quantitative variable for a given category.

In the rest of the tutorial, we focus on the D2 statistic. The correction of p-values by a sequential procedure leads to significant associations if the maximal pvalue is lower than  $\alpha = 0.05$ . When  $\alpha = 0.05$ , there are only 26 significant associations (while there are 51 when  $\alpha = \sqrt{0.05}$ , i.e. the biased version proposed by Dray and Legendre (2008)).

```
plot(four.comb.aravo, alpha = 0.05, stat = "D2")
```

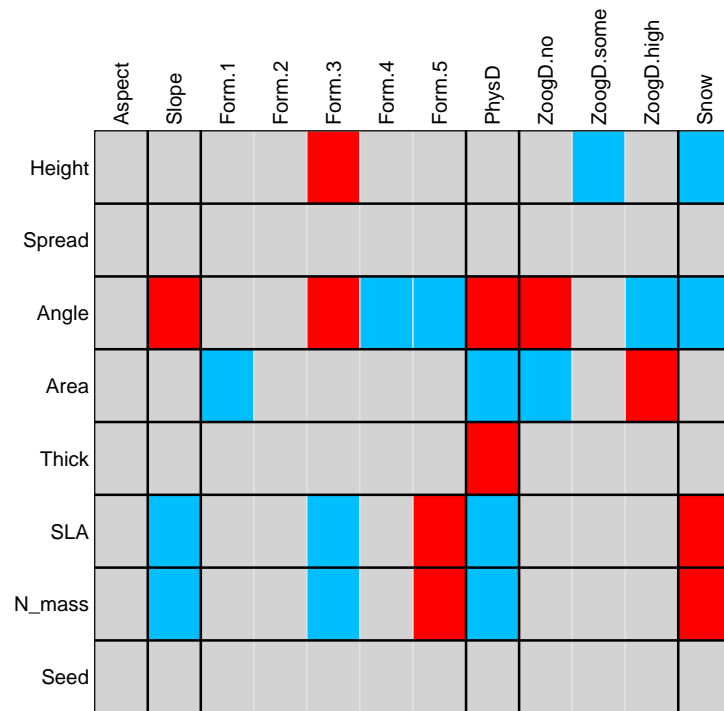

Now, we adjusted p-values for multiple comparisons (here we used the `fdr` method using the `p.adjust.4thcorner` function).

```
four.comb.aravo.adj <- p.adjust.4thcorner(four.comb.aravo,
  p.adjust.method.G = "fdr", p.adjust.method.D = "fdr")
```

Note that, adjusted p-values can be obtained directly using the `fourthcorner` function:

```
fourthcorner(aravo$env, aravo$spe, aravo$traits, modeltype = 6,
  p.adjust.method.G = "fdr", p.adjust.method.D = "fdr",
  nrepet = nrepet)
```

When adjusted p-values are used, there are 18 significant associations:

```
plot(four.comb.aravo.adj, alpha = 0.05, stat = "D2")
```

|        | Aspect | Slope | Form.1 | Form.2 | Form.3 | Form.4 | Form.5 | PhysD | ZoogD.no | ZoogD.some | ZoogD.high | Show |
|--------|--------|-------|--------|--------|--------|--------|--------|-------|----------|------------|------------|------|
| Height |        |       |        |        |        |        |        |       |          |            |            |      |
| Spread |        |       |        |        |        |        |        |       |          |            |            |      |
| Angle  |        |       |        |        |        |        |        |       |          |            |            |      |
| Area   |        |       |        |        |        |        |        |       |          |            |            |      |
| Thick  |        |       |        |        |        |        |        |       |          |            |            |      |
| SLA    |        |       |        |        |        |        |        |       |          |            |            |      |
| N_mass |        |       |        |        |        |        |        |       |          |            |            |      |
| Seed   |        |       |        |        |        |        |        |       |          |            |            |      |

## 4 Combining both approaches

First, a multivariate test can be applied to evaluate the global significance of the traits-environment relationships. This test is based on the total inertia of the RLQ analysis :

```
testrlq.aravo <- randtest(rlq.aravo, modeltype = 6, nrepet = nrepet)
```

The results are highly significant:

```
testrlq.aravo
```

```
class: krandtest
Monte-Carlo tests
Call: randtest.rlq(xtest = rlq.aravo, nrepet = nrepet, modeltype = 6)
```

```
Number of tests: 2
```

```
Adjustment method for multiple comparisons: none
```

```
Permutation number: 49999
```

```
Test Obs Std.Obs Alter Pvalue
```

```
1 Model 2 1.578 26.79 greater 2e-05
```

```
2 Model 4 1.578 13.36 greater 2e-05
```

```
other elements: adj.method call comb.pvalue
```

```
plot(testrlq.aravo)
```

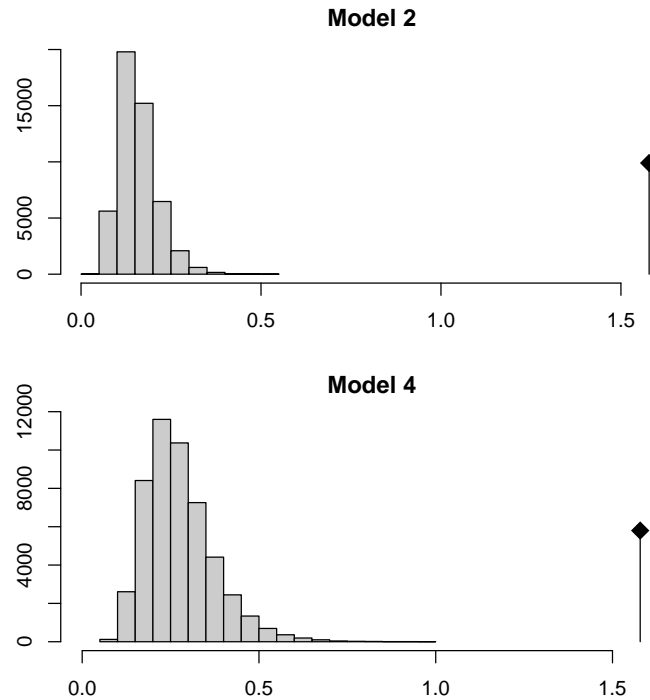

The total inertia of RLQ analysis is equal to the  $S_{RLQ}$  multivariate statistic defined in Dray and Legendre (2008). This statistic is returned by the `fourthcorner2` function:

```
Srlq <- fourthcorner2(aravo$env, aravo$spe, aravo$traits,
  modeltype = 6, p.adjust.method.G = "fdr", nrepet = nrepet)
```

```
Srlq$trRLQ
```

```
Monte-Carlo test
Call: fourthcorner2(tabR = aravo$env, tabL = aravo$spe, tabQ = aravo$traits,
  modeltype = 6, nrepet = nrepet, p.adjust.method.G = "fdr")
```

```
Observation: 1.578
```

```
Based on 49999 replicates
Simulated p-value: 2e-05
Alternative hypothesis: greater
```

| Std.Obs   | Expectation | Variance |
|-----------|-------------|----------|
| 26.739535 | 0.157577    | 0.002823 |

Both approaches can be combined if RLQ scores are used to represent traits and environmental variables on a biplot. Then, significant associations revealed by the `fourthcorner` approach can be represented using segments (blue lines for negative associations, red lines for positive associations, see the argument `col`). Only traits and environmental variables that have at least one significant association are represented. Here, we apply this method using adjusted pvalues for multiple comparisons and a significant level  $\alpha = 0.05$ .

```
plot(four.comb.aravo.adj, x.rlq = rlq.aravo, alpha = 0.05,
  stat = "D2", type = "biplot")
```

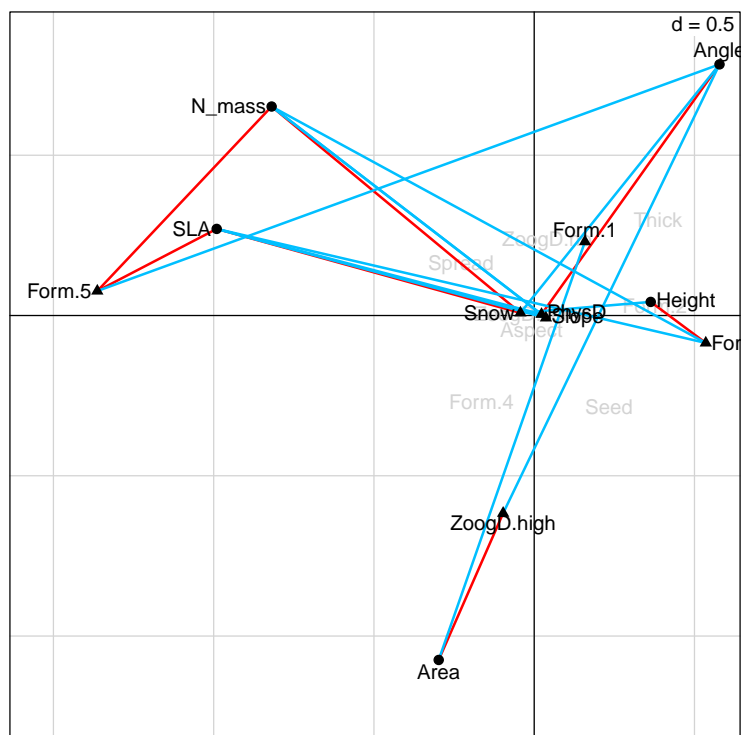

Another approach is provided by the `fourthcorner.rlq` function and consists in testing directly the links between RLQ axes and traits (`typetest="Q.axes"`) or environmental variables (`typetest="R.axes"`).

```
testQaxes.comb.aravo <- fourthcorner.rlq(rlq.aravo, modeltype = 6,
  typetest = "Q.axes", nrepet = nrepet, p.adjust.method.G = "fdr",
  p.adjust.method.D = "fdr")
testRaxes.comb.aravo <- fourthcorner.rlq(rlq.aravo, modeltype = 6,
  typetest = "R.axes", nrepet = nrepet, p.adjust.method.G = "fdr",
  p.adjust.method.D = "fdr")
```

```
print(testQaxes.comb.aravo, stat = "D")
```

#### Fourth-corner Statistics

Permutation method Comb. 2 and 4 ( 49999 permutations)

Adjustment method for multiple comparisons: fdr

call: `fourthcorner.rlq(xtest = rlq.aravo, nrepet = nrepet, modeltype = 6, typetest = "Q.axes", p.adjust.method.G = "fdr")`

---

|            | Test Stat         | Obs | Std.Obs   | Alter   | Pvalue              |
|------------|-------------------|-----|-----------|---------|---------------------|
| 1          | AxcR1 / Height    | r   | 0.166172  | 1.6580  | two-sided 0.0969    |
| 2          | AxcR2 / Height    | r   | 0.005482  | 0.0974  | two-sided 0.9247    |
| 3          | AxcR1 / Spread    | r   | -0.095280 | -0.9973 | two-sided 0.32498   |
| 4          | AxcR2 / Spread    | r   | 0.034635  | 0.5099  | two-sided 0.61842   |
| 5          | AxcR1 / Angle     | r   | 0.253857  | 2.5567  | two-sided 0.00826   |
| 6          | AxcR2 / Angle     | r   | 0.152269  | 2.1152  | two-sided 0.0327    |
| 7          | AxcR1 / Area      | r   | -0.119618 | -1.2661 | two-sided 0.20862   |
| 8          | AxcR2 / Area      | r   | -0.210731 | -2.9267 | two-sided 0.00278   |
| 9          | AxcR1 / Thick     | r   | 0.168446  | 1.6856  | two-sided 0.092     |
| 10         | AxcR2 / Thick     | r   | 0.058806  | 0.8700  | two-sided 0.39106   |
| 11         | AxcR1 / SLA       | r   | -0.434786 | -4.4161 | two-sided 2e-05     |
| 12         | AxcR2 / SLA       | r   | 0.063480  | 0.8974  | two-sided 0.37562   |
| 13         | AxcR1 / N_mass    | r   | -0.360835 | -3.6381 | two-sided 6e-05     |
| 14         | AxcR2 / N_mass    | r   | 0.139740  | 1.9484  | two-sided 0.04946   |
| 15         | AxcR1 / Seed      | r   | 0.107564  | 1.0502  | two-sided 0.30206   |
| 16         | AxcR2 / Seed      | r   | -0.059631 | -0.8104 | two-sided 0.42866   |
| Pvalue.adj |                   |     |           |         |                     |
| 1          |                   |     |           |         | 0.1938              |
| 2          |                   |     |           |         | 0.9247              |
| 3          | 0.472698181818182 |     |           |         | 0.659648            |
| 4          |                   |     |           |         | 0.03304 *           |
| 5          |                   |     |           |         | 0.10464             |
| 6          |                   |     |           |         | 0.37088             |
| 7          |                   |     |           |         | 0.014826666666667 * |
| 8          |                   |     |           |         | 0.1938              |
| 9          | 0.481304615384615 |     |           |         | 0.00032 ***         |
| 10         |                   |     |           |         | 0.481304615384615   |
| 11         |                   |     |           |         | 0.00048 ***         |
| 12         |                   |     |           |         |                     |
| 13         |                   |     |           |         |                     |

```

14 0.131893333333333
15 0.472698181818182
16 0.489897142857143

```

```

---
Signif. codes:  0 '***' 0.001 '**' 0.01 '*' 0.05 '.' 0.1 ' ' 1

```

```

print(testRaxes.comb.aravo, stat = "D")

```

#### Fourth-corner Statistics

```

-----
Permutation method Comb. 2 and 4 ( 49999 permutations)

```

```

Adjustment method for multiple comparisons:  fdr

```

```

call:  fourthcorner.rlq(xtest = rlq.aravo, nrepet = nrepet, modeltype = 6,      typetest = "R.axes", p.adjust.method.G = "fdr")

```

```

---

```

|            | Test               | Stat   | Obs      | Std.Obs | Alter     | Pvalue  |
|------------|--------------------|--------|----------|---------|-----------|---------|
| 1          | Aspect / AxcQ1     | r      | -0.01259 | -0.2301 | two-sided | 0.8181  |
| 2          | Slope / AxcQ1      | r      | 0.22652  | 4.1595  | two-sided | 2e-05   |
| 3          | Form.1 / AxcQ1     | Homog. | 0.23597  | -0.1475 | less      | 0.4639  |
| 4          | Form.2 / AxcQ1     | Homog. | 0.08358  | -0.3476 | less      | 0.42034 |
| 5          | Form.3 / AxcQ1     | Homog. | 0.26129  | -0.9018 | less      | 0.19488 |
| 6          | Form.4 / AxcQ1     | Homog. | 0.10294  | -1.6170 | less      | 0.01574 |
| 7          | Form.5 / AxcQ1     | Homog. | 0.13521  | -0.5296 | less      | 0.32994 |
| 8          | PhysD / AxcQ1      | r      | 0.30944  | 5.6603  | two-sided | 2e-05   |
| 9          | ZoogD.no / AxcQ1   | Homog. | 0.56986  | 2.8684  | less      | 0.99978 |
| 10         | ZoogD.some / AxcQ1 | Homog. | 0.30680  | -1.5000 | less      | 0.05672 |
| 11         | ZoogD.high / AxcQ1 | Homog. | 0.12234  | -1.3253 | less      | 0.05572 |
| 12         | Snow / AxcQ1       | r      | -0.49740 | -9.1299 | two-sided | 2e-05   |
| 13         | Aspect / AxcQ2     | r      | -0.09833 | -2.2865 | two-sided | 0.02102 |
| 14         | Slope / AxcQ2      | r      | -0.06159 | -1.2263 | two-sided | 0.22278 |
| 15         | Form.1 / AxcQ2     | Homog. | 0.17597  | -1.5871 | less      | 0.0399  |
| 16         | Form.2 / AxcQ2     | Homog. | 0.09112  | -0.0249 | less      | 0.55324 |
| 17         | Form.3 / AxcQ2     | Homog. | 0.28641  | -0.1094 | less      | 0.48694 |
| 18         | Form.4 / AxcQ2     | Homog. | 0.18260  | 0.8655  | less      | 0.80482 |
| 19         | Form.5 / AxcQ2     | Homog. | 0.24224  | 1.9512  | less      | 0.9591  |
| 20         | PhysD / AxcQ2      | r      | 0.06799  | 1.1106  | two-sided | 0.27244 |
| 21         | ZoogD.no / AxcQ2   | Homog. | 0.31611  | -2.6342 | less      | 0.0018  |
| 22         | ZoogD.some / AxcQ2 | Homog. | 0.37582  | 0.1249  | less      | 0.56468 |
| 23         | ZoogD.high / AxcQ2 | Homog. | 0.24031  | 2.0419  | less      | 0.9611  |
| 24         | Snow / AxcQ2       | r      | 0.12693  | 1.2298  | two-sided | 0.2239  |
| Pvalue.adj |                    |        |          |         |           |         |
| 1          | 0.908356363636364  |        |          |         |           |         |
| 2          | 0.00016            | ***    |          |         |           |         |
| 3          | 0.618533333333333  |        |          |         |           |         |
| 4          | 0.63051            |        |          |         |           |         |
| 5          | 0.33408            |        |          |         |           |         |
| 6          | 0.0539657142857143 | .      |          |         |           |         |
| 7          | 0.465797647058824  |        |          |         |           |         |
| 8          | 0.00016            | ***    |          |         |           |         |
| 9          | 0.99978            |        |          |         |           |         |
| 10         | 0.123752727272727  |        |          |         |           |         |
| 11         | 0.121570909090909  |        |          |         |           |         |
| 12         | 0.00016            | ***    |          |         |           |         |
| 13         | 0.056053333333333  | .      |          |         |           |         |
| 14         | 0.35824            |        |          |         |           |         |
| 15         | 0.09576            | .      |          |         |           |         |
| 16         | 0.69882947368421   |        |          |         |           |         |
| 17         | 0.687444705882353  |        |          |         |           |         |
| 18         | 0.919794285714286  |        |          |         |           |         |
| 19         | 0.99378            |        |          |         |           |         |
| 20         | 0.40866            |        |          |         |           |         |
| 21         | 0.00864            | **     |          |         |           |         |
| 22         | 0.71328            |        |          |         |           |         |
| 23         | 0.99978            |        |          |         |           |         |
| 24         | 0.35824            |        |          |         |           |         |

```

---
Signif. codes:  0 '***' 0.001 '**' 0.01 '*' 0.05 '.' 0.1 ' ' 1

```

Results can be represented using a table with colors indicating significance :

```

par(mfrow = c(1, 2))
plot(testQaxes.comb.aravo, alpha = 0.05, type = "table",
     stat = "D2")
plot(testRaxes.comb.aravo, alpha = 0.05, type = "table",
     stat = "D2")

```

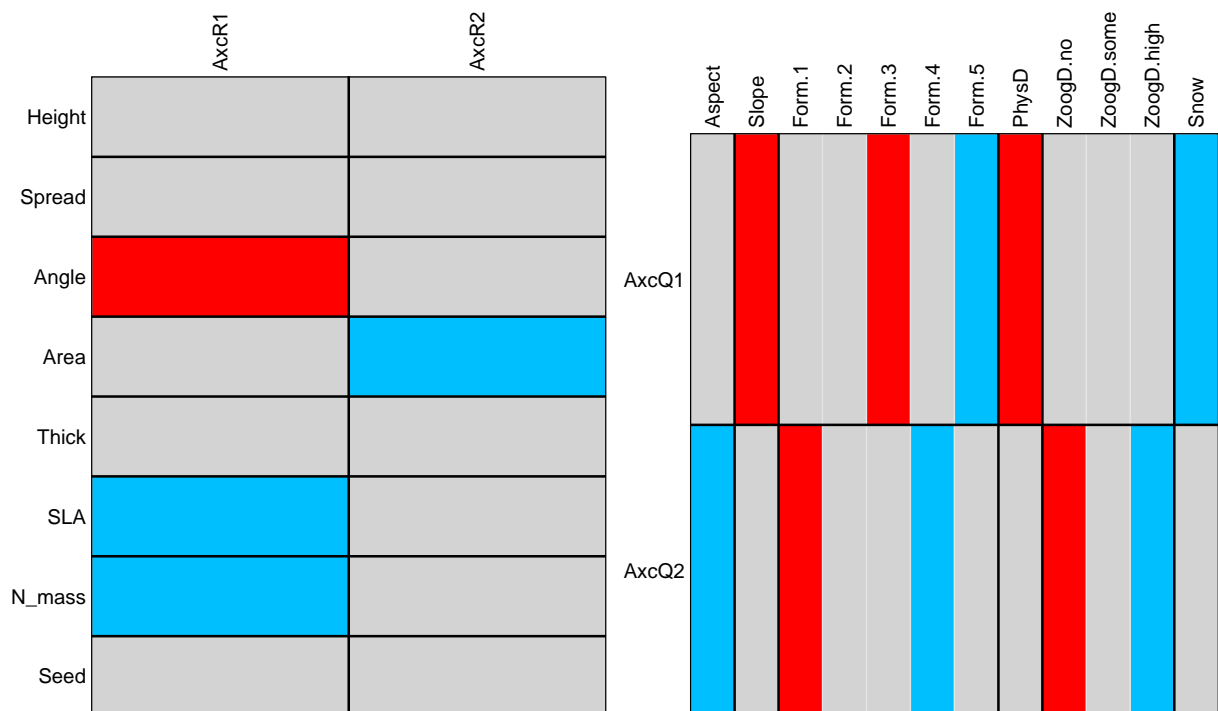

Significance with axes can also be reported on the factorial map of RLQ analysis. Here, significant associations with the first axis are represented in blue, with the second axis in orange, with both axes in green (variables with no significant association are in black):

```
par(mfrow = c(1, 2))
plot(testQaxes.comb.aravo, alpha = 0.05, type = "biplot",
     stat = "D2", col = c("black", "blue", "orange", "green"))
plot(testRaxes.comb.aravo, alpha = 0.05, type = "biplot",
     stat = "D2", col = c("black", "blue", "orange", "green"))
```

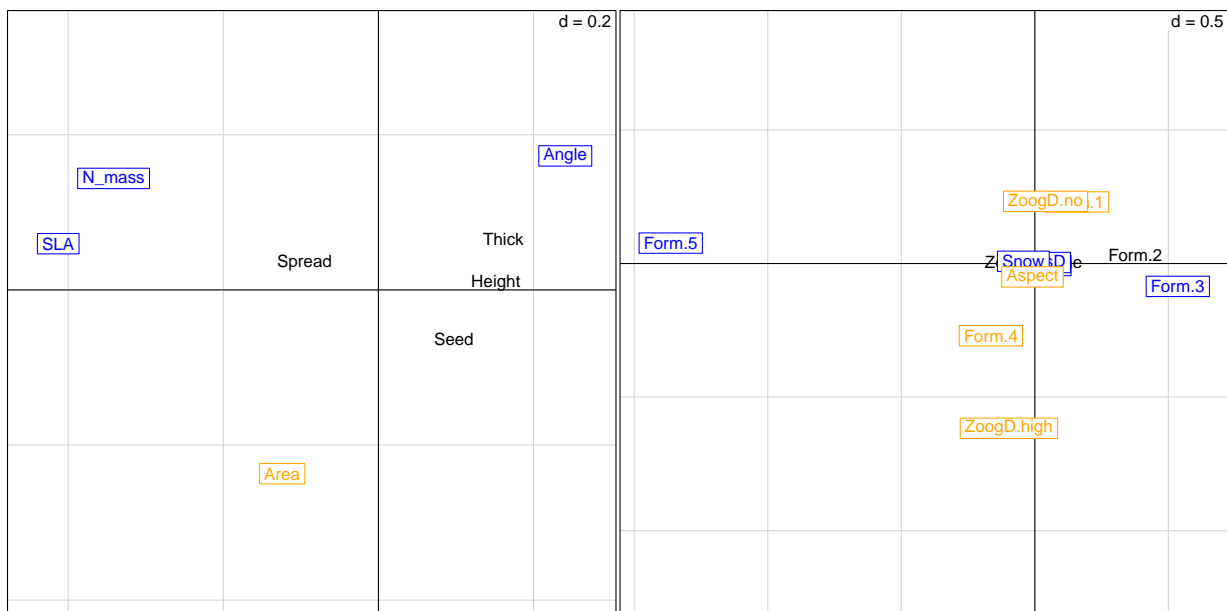

## References

S. Dray and A. B. Dufour. The ade4 package: implementing the duality diagram for ecologists. *Journal of Statistical Software*, 22(4):1–20, 2007.

- S. Dray and P. Legendre. Testing the species traits-environment relationships: the fourth-corner problem revisited. *Ecology*, 89:3400–3412, 2008.
- P. Legendre, R. Galzin, and M. L. Harmelin-Vivien. Relating behavior to habitat: solutions to the fourth-corner problem. *Ecology*, 78(2):547–562, 1997.
